# Supplementary material for: Prognosis of Guillain–Barré Syndrome Linked to COVID-19 Vaccination
Source: MDPI journal article supplement (doi:10.3390/brainsci12060711), 2022-05-30
Supplement: s1 [file s1]

## **Supplementary Materials**

### **Annex 1**

#### **Database search strategy**

PubMed: 88

((Guillain-Barré syndrome) OR (Miller Fisher syndrome) OR (cranial polyneuritis) OR (facial diplegia) OR (Acute sensory ataxia) OR (Bickerstaff encephalitis) OR (acute inflammatory demyelinating polyneuropathy) OR (acute motor axonal neuropathy) OR (acute motor and sensory axonal neuropathy)) AND  
((SARS-CoV-2 vaccine) OR (SARS-CoV-2 vaccination) OR (COVID-19 vaccine) OR (COVID-19 vaccination))

Time: 2021-01-01 to 2021-11-01

Web of Science: 69

Step 1: Topic (Guillain-Barré syndrome) OR (Miller Fisher syndrome) OR (cranial polyneuritis) OR (facial diplegia) OR (Acute sensory ataxia) OR (Bickerstaff encephalitis) OR (acute inflammatory demyelinating polyneuropathy) OR (acute motor axonal neuropathy) OR (acute motor and sensory axonal neuropathy)  
Step 2: Topic (SARS-CoV-2 vaccine) OR (SARS-CoV-2 vaccination) OR (COVID-19 vaccine) OR (COVID-19 vaccination)

Search: 1 AND 2

Time: 2021-01-01 to 2021-11-01

Embase: 63

Guillain-Barre syndrome AND (SARS-CoV-2 vaccine OR SARS-CoV-2 vaccination OR COVID-19 vaccine OR COVID-19 vaccination)

Time: 2021-01-01 to 2021-11-01

**Table S1. Demographic characteristics and COVID-19 vaccine data of the 57 patients.**

| Author (country)                     | Age (years) | Gender | Past medical history                                  | Vaccine type               | Dose number | Onset duration (days) |
|--------------------------------------|-------------|--------|-------------------------------------------------------|----------------------------|-------------|-----------------------|
| Wai et al (Australia) <sup>1</sup>   | 51          | M      | NSTEMI, 8 weeks post influenza vaccine                | Viral Vector (Astrazeneca) | 1           | 14                    |
|                                      | 65          | F      | 4 weeks post influenza vaccine                        | Viral Vector (Astrazeneca) | 1           | 7                     |
|                                      | 72          | M      | Idiopathic Neuropathy, 6 weeks post influenza vaccine | Viral Vector (Astrazeneca) | 1           | 21                    |
|                                      | 66          | M      | RCC, AF, HLD, 8 weeks post influenza vaccine          | Viral Vector (Astrazeneca) | 1           | 21                    |
| Grimshaw et al (Mexico) <sup>2</sup> | 25          | M      | Gastrointestinal infection (8 days ago)               | mRNA (Pfizer)              | 1           | 12                    |
|                                      | 53          | F      | Drug allergy, Previous COVID, Norovirus (2 days ago)  | mRNA (Pfizer)              | 1           | 6                     |
|                                      | 72          | M      | Acute Hepatitis (56 days ago)                         | mRNA (Pfizer)              | 1           | 4                     |
|                                      | 31          | M      | Nil                                                   | mRNA (Pfizer)              | 1           | 11                    |
|                                      | 67          | F      | Nil                                                   | mRNA (Pfizer)              | 1           | 4                     |
|                                      | 81          | F      | HTN, CKD, 40 days post influenza vaccine              | mRNA (Pfizer)              | 1           | 3                     |
| Hasan et al (UK) <sup>3</sup>        | 62          | F      | bronchiectasis, asthma, osteoporosis and migraine     | Viral Vector (Astrazeneca) | 1           | 11                    |
| Mckean et al (Malta) <sup>4</sup>    | 48          | M      | HLD                                                   | Viral Vector (Astrazeneca) | 1           | 10                    |
| Razok et al (Qatar) <sup>5</sup>     | 73          | M      | HTN, RA                                               | mRNA (Pfizer)              | 2           | 20                    |
| YG Min et al (S. Korea) <sup>6</sup> | 58          | M      | Nil                                                   | Viral Vector (Astrazeneca) | 1           | 15                    |
| Scendoni et al (Italy) <sup>7</sup>  | 82          | F      | AF, HTN, bilateral hip prosthesis                     | mRNA (Pfizer)              | 2           | 14                    |
| Suri et al (India) <sup>8</sup>      | 47          | M      | DM, HTN, COVID-19 Pneumonia 7 months prior            | Viral Vector (Astrazeneca) | 1           | 17                    |

|                                           |    |   |                                                                                           |                                                |    |    |
|-------------------------------------------|----|---|-------------------------------------------------------------------------------------------|------------------------------------------------|----|----|
| Waheed et al (US) <sup>9</sup>            | 82 | F | Nil                                                                                       | mRNA (Pfizer)                                  | 1  | 14 |
| Tutar et al (Turkey) <sup>10</sup>        | 76 | M | Nil                                                                                       | Inactivated<br>(CoronaVac-SinoVac)             | 2  | 14 |
| Maramattom et al<br>(India) <sup>11</sup> | 43 | F | Nil                                                                                       | Viral Vector<br>(Astrazeneca)                  | 1  | 10 |
|                                           | 67 | F | Nil                                                                                       | Viral Vector<br>(Astrazeneca)                  | 1  | 14 |
|                                           | 53 | F | Nil                                                                                       | Viral Vector<br>(Astrazeneca)                  | 1  | 12 |
|                                           | 68 | F | Nil                                                                                       | Viral Vector<br>(Astrazeneca)                  | 1  | 14 |
|                                           | 70 | M | Nil                                                                                       | Viral Vector<br>(Astrazeneca)                  | 1  | 11 |
|                                           | 69 | F | Nil                                                                                       | Viral Vector<br>(Astrazeneca)                  | 1  | 12 |
|                                           | 69 | F | Nil                                                                                       | Viral Vector<br>(Astrazeneca)                  | 1  | 13 |
| Introna et al (Italy) <sup>12</sup>       | 62 | M | HTN                                                                                       | Viral Vector<br>(Astrazeneca)                  | 1  | 10 |
| Rossetti et al (US) <sup>13</sup>         | 38 | M | Anxiety, Depression                                                                       | Viral Vector<br>(Janssen/Johnson &<br>Johnson) | NA | 14 |
| Nasuelli et al (Italy) <sup>14</sup>      | 59 | M | HTN, Hyperuricemia                                                                        | Viral Vector<br>(Astrazeneca)                  | NA | 10 |
| Hughes et al (US) <sup>15</sup>           | 65 | M | Post Liver Transplant<br>for Cryptogenic Liver<br>Cirrhosis in June 2020,<br>CAD, DM, HLD | mRNA (Pfizer)                                  | 1  | 2  |
| Prasad et al (US) <sup>16</sup>           | 41 | M | Morbid obesity                                                                            | Viral Vector<br>(Janssen/Johnson &<br>Johnson) | 1  | 21 |
| Allen et al (UK) <sup>17</sup>            | 54 | M | Nil                                                                                       | Viral Vector<br>(Astrazeneca)                  | 1  | 12 |
|                                           | 57 | M | Asthma, Osteoarthritis                                                                    | Viral Vector<br>(Astrazeneca)                  | 1  | 11 |
| Ogbebor et al (US) <sup>18</sup>          | 86 | F | HTN, RA, DCIS of the<br>breast, osteoporosis                                              | mRNA (Pfizer)                                  | 1  | 1  |
| Bonifacio et al<br>(UK) <sup>19</sup>     | 43 | M | Nil                                                                                       | Viral Vector<br>(Astrazeneca)                  | 1  | 11 |

|                                          |    |   |                                                                            |                                                |   |    |
|------------------------------------------|----|---|----------------------------------------------------------------------------|------------------------------------------------|---|----|
|                                          | 66 | M | Nil                                                                        | Viral Vector<br>(Astrazeneca)                  | 1 | 7  |
|                                          | 51 | M | Nil                                                                        | Viral Vector<br>(Astrazeneca)                  | 1 | 21 |
|                                          | 71 | F | Nil                                                                        | Viral Vector<br>(Astrazeneca)                  | 1 | 12 |
|                                          | 53 | M | Nil                                                                        | Viral Vector<br>(Astrazeneca)                  | 1 | 8  |
| Bax et al (Italy) <sup>20</sup>          | 90 | M | HTN, CKD, psoriasis,<br>previous gastric<br>resection and<br>prostatectomy | mRNA (Pfizer)                                  | 2 | 3  |
|                                          | 51 | F | Nil                                                                        | Viral Vector<br>(Astrazeneca)                  | 1 | 10 |
| Matarneh et al<br>(Qatar) <sup>21</sup>  | 61 | M | Nil                                                                        | mRNA (Moderna)                                 | 2 | 4  |
| Trimboli et al<br>(Italy) <sup>22</sup>  | 25 | F | Nil                                                                        | mRNA (Pfizer)                                  | 2 | 4  |
| Rao et al (US) <sup>23</sup>             | 42 | F | Nil                                                                        | mRNA (Pfizer)                                  | 2 | 7  |
| James et al (India) <sup>24</sup>        | 60 | M | COPD                                                                       | Viral Vector<br>(Astrazeneca)                  | 1 | 11 |
|                                          | 66 | M | Nil                                                                        | Viral Vector<br>(Astrazeneca)                  | 1 | 12 |
|                                          | 54 | F | Breast Cancer                                                              | Viral Vector<br>(Astrazeneca)                  | 1 | 13 |
| Kripalani et al<br>(India) <sup>25</sup> | 52 | F | Nil                                                                        | Viral Vector<br>(Astrazeneca)                  | 1 | 9  |
| Patel et al (UK) <sup>26</sup>           | 37 | M | Nil                                                                        | Viral Vector<br>(Astrazeneca)                  | 1 | 14 |
| Morehouse et al<br>(US) <sup>27</sup>    | 49 | F | Neurofibromatosis type<br>1, hypothyroidism,<br>vitamin deficiencies       | Viral Vector<br>(Janssen/Johnson &<br>Johnson) | 1 | 5  |
| Kanabar et al (UK) <sup>28</sup>         | 61 | F | Multiple Sclerosis                                                         | Viral Vector<br>(Astrazeneca)                  | 1 | 10 |
|                                          | 56 | M | Nil                                                                        | Viral Vector<br>(Astrazeneca)                  | 1 | 7  |
| Dalwadi et al (US) <sup>29</sup>         | 86 | F | AF, DM, aortic<br>stenosis, ischemic                                       | mRNA (Moderna)                                 | 2 | 2  |

|                                             |    |   |                                                                                           |                                                |    |    |
|---------------------------------------------|----|---|-------------------------------------------------------------------------------------------|------------------------------------------------|----|----|
| Aomar-Millán et al<br>(Spain) <sup>30</sup> | 77 | M | stroke (no residue<br>deficits)<br>Nil                                                    | mRNA (Pfizer)                                  | 1  | 3  |
| Jain et al (US) <sup>31</sup>               | 65 | F | HTN, DM, HLD,<br>allergies to<br>ciprofloxacin, codeine,<br>penicillin, and egg<br>whites | Viral Vector<br>(Janssen/Johnson &<br>Johnson) | NA | 15 |
| Márquez et al (US) <sup>32</sup>            | 60 | F | Nil                                                                                       | Viral Vector<br>(Janssen/Johnson &<br>Johnson) | 1  | 10 |
| Da Silva et al<br>(Brazil) <sup>33</sup>    | 62 | F | HTN, CCF                                                                                  | Viral Vector<br>(Astrazeneca)                  | 1  | 18 |
| Shao et al (Taiwan) <sup>34</sup>           | 41 | M | Nil                                                                                       | Viral Vector<br>(Astrazeneca)                  | 1  | 7  |

---

Abbreviations: GBS = Guillain-Barré syndrome; COVID-19 = coronavirus disease 2019; NSTEMI = non-ST-elevation myocardial infarction; RCC = renal cell carcinoma; AF = atrial fibrillation; HTN = hypertension; HLD = hyperlipidaemia; DM = diabetes mellitus; CKD = chronic kidney disease; CAD = coronary artery disease; CCF = congestive cardiac failure; RA = rheumatoid arthritis; DCIS = ductal carcinoma in-situ; COPD = chronic obstructive pulmonary disease.

**Table S2. Clinical presentation and severity of the 57 patients.**

| <b>Author<br/>(country)</b>                | <b>LL<br/>weak<br/>ness<br/>(1 =<br/>Yes,<br/>0 =<br/>No)</b> | <b>4 Limbs<br/>weakness<br/>(1 = Yes, 0<br/>= No)</b> | <b>Hypoareflexia<br/>(1 = Yes, 0 =<br/>No)</b> | <b>Sensory<br/>disturba<br/>nce<br/>(1= Yes,<br/>0 = No)</b> | <b>CN<br/>involve<br/>ment<br/>(1=<br/>Yes, 0<br/>= No)</b> | <b>Dysauto<br/>nomia<br/>(1 = Yes,<br/>0 = No)</b> | <b>Ataxi<br/>a<br/>(1=<br/>Yes,<br/>0 =<br/>No)</b> | <b>LBP<br/>(1=<br/>Yes,<br/>0 =<br/>No)</b> | <b>Other</b> | <b>GBS clinical<br/>classification</b> | <b>Respiratory<br/>failure</b> | <b>Ventila<br/>tion</b> | <b>ICU</b> |
|--------------------------------------------|---------------------------------------------------------------|-------------------------------------------------------|------------------------------------------------|--------------------------------------------------------------|-------------------------------------------------------------|----------------------------------------------------|-----------------------------------------------------|---------------------------------------------|--------------|----------------------------------------|--------------------------------|-------------------------|------------|
| Wai et al<br>(Australia) <sup>1</sup>      | No                                                            | Yes                                                   | Yes                                            | Yes                                                          | Yes                                                         | No                                                 | Yes                                                 | Yes                                         | No           | Classic GBS                            | Yes                            | Yes                     | Yes        |
|                                            | No                                                            | Yes                                                   | Yes                                            | Yes                                                          | Yes                                                         | No                                                 | No                                                  | Yes                                         | No           | Classic GBS                            | Yes                            | Yes                     | Yes        |
|                                            | No                                                            | Yes                                                   | Yes                                            | Yes                                                          | No                                                          | No                                                 | No                                                  | No                                          | No           | Classic GBS                            | No                             | No                      | No         |
|                                            | Yes                                                           | No                                                    | Yes                                            | Yes                                                          | Yes                                                         | No                                                 | No                                                  | Yes                                         | No           | Paraparetic<br>GBS                     | No                             | No                      | No         |
| Grimshaw<br>et al<br>(Mexico) <sup>2</sup> | No                                                            | Yes                                                   | No                                             | Yes                                                          | No                                                          | No                                                 | No                                                  | No                                          | No           | Classic GBS                            | No                             | No                      | No         |
|                                            | No                                                            | Yes                                                   | Yes                                            | No                                                           | No                                                          | No                                                 | No                                                  | No                                          | No           | Classic GBS                            | Yes                            | Yes                     | Yes        |
|                                            | No                                                            | Yes                                                   | Yes                                            | No                                                           | No                                                          | No                                                 | No                                                  | No                                          | No           | Classic GBS                            | No                             | No                      | No         |
|                                            | No                                                            | Yes                                                   | Yes                                            | No                                                           | No                                                          | No                                                 | No                                                  | No                                          | No           | Classic GBS                            | No                             | No                      | No         |
|                                            | No                                                            | Yes                                                   | Yes                                            | No                                                           | No                                                          | No                                                 | No                                                  | No                                          | No           | Classic GBS                            | Yes                            | Yes                     | Yes        |
| Hasan et al<br>(UK) <sup>3</sup>           | No                                                            | Yes                                                   | Yes                                            | Yes                                                          | Yes                                                         | No                                                 | No                                                  | No                                          | No           | Classic GBS                            | No                             | No                      | No         |
| Mckean et<br>al (Malta) <sup>4</sup>       | Yes                                                           | No                                                    | Yes                                            | Yes                                                          | Yes                                                         | No                                                 | No                                                  | Yes                                         | No           | Classic GBS                            | Yes                            | Yes                     | Yes        |
| Razok et al<br>(Qatar) <sup>5</sup>        | Yes                                                           | No                                                    | Yes                                            | No                                                           | No                                                          | No                                                 | No                                                  | No                                          | No           | Paraparetic<br>GBS                     | No                             | No                      | No         |
| YG Min et<br>al (S.<br>Korea) <sup>6</sup> | No                                                            | No                                                    | No                                             | Yes                                                          | Yes                                                         | No                                                 | No                                                  | No                                          | No           | Paraparetic<br>GBS                     | No                             | No                      | No         |
| Scendoni<br>et al<br>(Italy) <sup>7</sup>  | No                                                            | Yes                                                   | Yes                                            | Yes                                                          | No                                                          | No                                                 | No                                                  | No                                          | No           | Classic GBS                            | No                             | No                      | No         |
| Suri et al<br>(India) <sup>8</sup>         | No                                                            | Yes                                                   | Yes                                            | Yes                                                          | Yes                                                         | No                                                 | No                                                  | No                                          | No           | Classic GBS                            | No                             | No                      | No         |

|                                         |     |     |     |     |     |     |     |     |    |                                  |     |     |     |
|-----------------------------------------|-----|-----|-----|-----|-----|-----|-----|-----|----|----------------------------------|-----|-----|-----|
| Waheed et al (US) <sup>9</sup>          | Yes | No  | Yes | Yes | No  | No  | No  | Yes | No | Paraparetic GBS                  | No  | No  | No  |
| Tutar et al (Turkey) <sup>10</sup>      | No  | Yes | Yes | Yes | No  | No  | No  | No  | No | Classic GBS                      | No  | No  | No  |
| Maramatto m et al (India) <sup>11</sup> | No  | Yes | Yes | No  | Yes | No  | No  | Yes | No | Classic GBS                      | Yes | Yes | Yes |
|                                         | No  | Yes | Yes | Yes | Yes | No  | No  | No  | No | Classic GBS                      | Yes | Yes | Yes |
|                                         | No  | Yes | Yes | Yes | Yes | No  | No  | No  | No | Classic GBS                      | Yes | Yes | Yes |
|                                         | No  | Yes | Yes | Yes | Yes | No  | No  | No  | No | Classic GBS                      | Yes | Yes | Yes |
|                                         | No  | Yes | Yes | Yes | Yes | No  | No  | No  | No | Classic GBS                      | Yes | Yes | Yes |
|                                         | No  | Yes | Yes | Yes | Yes | No  | No  | No  | No | Classic GBS                      | No  | No  | No  |
|                                         | No  | Yes | Yes | Yes | Yes | No  | No  | No  | No | Classic GBS                      | Yes | Yes | Yes |
| Introna et al (Italy) <sup>12</sup>     | No  | Yes | No | Classic GBS                      | No  | No  | Yes |
| Rossetti et al (US) <sup>13</sup>       | No  | No  | Yes | Yes | Yes | No  | No  | No  | No | Facial diplegia with parasthesia | No  | No  | No  |
| Nasuelli et al (Italy) <sup>14</sup>    | No  | No  | Yes | Yes | Yes | Yes | Yes | No  | No | Facial diplegia with parasthesia | No  | No  | No  |
| Hughes et al (US) <sup>15</sup>         | No  | Yes | Yes | Yes | Yes | No  | No  | No  | No | Classic GBS                      | No  | No  | No  |
| Prasad et al (US) <sup>16</sup>         | No  | Yes | Yes | No  | Yes | No  | Yes | No  | No | Classic GBS                      | No  | No  | No  |
| Allen et al (UK) <sup>17</sup>          | No  | No  | No  | Yes | Yes | No  | No  | No  | No | Facial diplegia with parasthesia | No  | No  | No  |
|                                         | No  | Yes | Yes | Yes | Yes | No  | No  | Yes | No | Classic GBS                      | No  | No  | No  |
| Ogbebor et al (US) <sup>18</sup>        | Yes | No  | Yes | No  | No  | No  | No  | No  | No | Paraparetic GBS                  | No  | No  | No  |
| Bonifacio et al (UK) <sup>19</sup>      | No  | No  | Yes | Yes | Yes | Yes | Yes | No  | No | Facial diplegia with parasthesia | No  | No  | No  |
|                                         | No  | No  | Yes | Yes | Yes | No  | Yes | Yes | No | Facial diplegia with parasthesia | No  | No  | No  |

|                                       |     |     |     |     |     |     |     |     |                          |                                  |     |     |     |
|---------------------------------------|-----|-----|-----|-----|-----|-----|-----|-----|--------------------------|----------------------------------|-----|-----|-----|
|                                       | No  | No  | Yes | Yes | Yes | No  | Yes | No  | No                       | Facial diplegia with parasthesia | No  | No  | No  |
|                                       | Yes | No  | Yes | No  | Yes | No  | Yes | Yes | Yes (abdominal pain)     | Facial diplegia with parasthesia | No  | No  | No  |
|                                       | No  | No  | Yes | Yes | Yes | No  | No  | Yes | No                       | Facial diplegia with parasthesia | No  | No  | No  |
| Bax et al (Italy) <sup>20</sup>       | No  | Yes | No  | Yes | No  | No  | Yes | No  | No                       | Classic GBS                      | No  | No  | No  |
|                                       | Yes | No  | Yes | Yes | Yes | Yes | No  | No  | No                       | Paraparetic GBS                  | No  | No  | No  |
| Matarneh et al (Qatar) <sup>21</sup>  | No  | No  | No  | Yes | No  | No  | No  | No  | Yes (distal UL weakness) | Cervicobrachial Weakness         | No  | No  | No  |
| Trimboli et al (Italy) <sup>22</sup>  | Yes | No  | Yes | Yes | No  | No  | Yes | No  | No                       | Paraparetic GBS                  | No  | No  | No  |
| Rao et al (US) <sup>23</sup>          | No  | Yes | Yes | Yes | No  | Yes | No  | No  | No                       | Classic GBS                      | No  | No  | No  |
| James et al (India) <sup>24</sup>     | No  | Yes | Yes | Yes | Yes | No  | No  | No  | Yes (pain over torso)    | Classic GBS                      | No  | No  | No  |
|                                       | No  | Yes | Yes | Yes | No  | Yes | No  | No  | Yes                      | Classic GBS                      | No  | No  | No  |
|                                       | No  | Yes | Yes | No  | No  | No  | No  | No  | Yes (cough)              | Classic GBS                      | No  | No  | No  |
| Kripalani et al (India) <sup>25</sup> | No  | Yes | Yes | No  | No  | No  | No  | Yes | Yes (fatigue)            | Classic GBS                      | Yes | Yes | Yes |
| Patel et al (UK) <sup>26</sup>        | No  | Yes | Yes | Yes | No  | No  | Yes | Yes | No                       | Classic GBS                      | No  | No  | Yes |
| Morehouse et al (US) <sup>27</sup>    | No  | Yes | Yes | Yes | Yes | Yes | No  | Yes | No                       | Classic GBS                      | Yes | Yes | Yes |



|                                          |     |     |     |     |     |     |    |     |                                          |                                     |     |    |     |
|------------------------------------------|-----|-----|-----|-----|-----|-----|----|-----|------------------------------------------|-------------------------------------|-----|----|-----|
| Kanabar et al (UK) <sup>28</sup>         | Yes | No  | Yes | Yes | Yes | No  | No | No  | No                                       | Facial diplegia with parasthesia    | No  | No | No  |
|                                          | No  | No  | Yes | Yes | Yes | No  | No | Yes | No                                       | Facial diplegia with parasthesia    | No  | No | No  |
| Dalwadi et al (US) <sup>29</sup>         | No  | Yes | No  | No  | No  | No  | No | No  | No                                       | Classic GBS                         | No  | No | No  |
| Aomar-Millán et al (Spain) <sup>30</sup> | Yes | No  | Yes | Yes | No  | No  | No | No  | Yes (pitting oedema)                     | Paraparetic GBS                     | Yes | No | No  |
| Jain et al (US) <sup>31</sup>            | No  | No  | Yes | No  | Yes | No  | No | No  | Yes (headache, neck pain, shoulder pain) | Facial diplegia without parasthesia | No  | No | Yes |
| Márquez et al (US) <sup>32</sup>         | Yes | No  | Yes | Yes | Yes | No  | No | No  | Yes (headache, N&V)                      | Paraparetic GBS                     | No  | No | No  |
| Da Silva et al (Brazil) <sup>33</sup>    | No  | Yes | Yes | Yes | Yes | Yes | No | No  | No                                       | Classic GBS                         | No  | No | No  |
| Shao et al (Taiwan) <sup>34</sup>        | No  | No  | No  | Yes | Yes | No  | No | No  | No                                       | Facial diplegia with parasthesia    | No  | No | No  |

Abbreviations: GBS = Guillain-Barré syndrome; CN = cranial nerve; LBP = lower back pain; UL = upper limb; LL = Lower limb.

**Table S3. Investigation results, treatment, and outcomes of the 57 patients.**

| <b>Author<br/>(country)</b>             | <b>Albuminocytological<br/>dissociation (CSF<br/>protein, mg/dL)</b> | <b>Electrodiagnosis</b> | <b>Brighton<br/>criteria</b> | <b>Antiganglioside<br/>Antibody</b> | <b>Treatment</b> | <b>Treatment<br/>outcome</b> | <b>GBS<br/>disability<br/>score (post-<br/>treatment<br/>outcome)</b> |
|-----------------------------------------|----------------------------------------------------------------------|-------------------------|------------------------------|-------------------------------------|------------------|------------------------------|-----------------------------------------------------------------------|
| Wai et al<br>(Australia) <sup>1</sup>   | Yes (70)                                                             | AIDP                    | 1                            | NA                                  | IVIg             | No improvement               | 5                                                                     |
|                                         | Yes (251)                                                            | AIDP                    | 1                            | Negative                            | IVIg             | Definite<br>improvement      | NA                                                                    |
|                                         | Yes (55)                                                             | AIDP                    | 1                            | NA                                  | IVIg             | Definite<br>improvement      | 2                                                                     |
|                                         | Yes (150)                                                            | AIDP                    | 1                            | NA                                  | IVIg             | Definite<br>improvement      | NA                                                                    |
| Grimshaw et al<br>(Mexico) <sup>2</sup> | Yes (64)                                                             | AIDP                    | 1                            | NA                                  | IVIg             | Definite<br>improvement      | 3                                                                     |
|                                         | Yes (15)                                                             | AMAN                    | 2                            | NA                                  | IVIg             | Minimal<br>improvement       | 5                                                                     |
|                                         | NA                                                                   | AMAN                    | 2                            | NA                                  | IVIg             | Definite<br>improvement      | 4                                                                     |
|                                         | NA                                                                   | AIDP                    | 2                            | NA                                  | IVIg             | Definite<br>improvement      | 3                                                                     |
|                                         | Yes (30)                                                             | AMAN                    | 2                            | NA                                  | IVIg             | No improvement               | 6                                                                     |
|                                         | Yes (414)                                                            | AIDP                    | 1                            | NA                                  | IVIg             | Definite<br>improvement      | 4                                                                     |
| Hasan et al<br>(UK) <sup>3</sup>        | Yes (90)                                                             | AIDP                    | 1                            | NA                                  | IVIg             | No improvement               | 5                                                                     |
| Mckean et al<br>(Malta) <sup>4</sup>    | Yes (126.4)                                                          | AIDP                    | 1                            | Negative                            | IVIg             | Definite<br>improvement      | 1                                                                     |
| Razok et al<br>(Qatar) <sup>5</sup>     | Yes (80)                                                             | AIDP                    | 1                            | NA                                  | IVIg             | Definite<br>improvement      | 0                                                                     |
| YG Min et al (S.<br>Korea) <sup>6</sup> | Yes (70)                                                             | AIDP                    | 1                            | Negative                            | Gabapentin       | Minimal<br>improvement       | 1                                                                     |
| Scandoni et al<br>(Italy) <sup>7</sup>  | Yes (570)                                                            | AMSAN                   | 1                            | Negative                            | IVIg             | Definite<br>improvement      | 4                                                                     |
| Suri et al<br>(India) <sup>8</sup>      | Yes (250)                                                            | AIDP                    | 1                            | Negative                            | IVIg             | Minimal<br>improvement       | 1                                                                     |

|                                        |             |           |   |          |                   |                      |    |
|----------------------------------------|-------------|-----------|---|----------|-------------------|----------------------|----|
| Waheed et al (US) <sup>9</sup>         | Yes (88)    | NA        | 2 | NA       | IVIg              | Definite improvement | NA |
| Tutar et al (Turkey) <sup>10</sup>     | NA          | AMSAN     | 2 | NA       | IVIg              | NA                   | 2  |
| Maramattom et al (India) <sup>11</sup> | Yes (85)    | AIDP      | 1 | NA       | IVIg              | Definite improvement | 0  |
|                                        | Yes (345)   | AMSAN     | 1 | Negative | IVIg              | Minimal improvement  | 4  |
|                                        | Yes (120)   | AIDP      | 1 | Negative | IVIg              | Minimal improvement  | 4  |
|                                        | Yes (75)    | AIDP      | 1 | Negative | IVIg              | Minimal improvement  | 4  |
|                                        | NA          | AIDP      | 2 | NA       | IVIg              | Minimal improvement  | 4  |
|                                        | NA          | AIDP      | 2 | NA       | IVIg              | Minimal improvement  | 4  |
|                                        | Yes (83)    | AIDP      | 2 | NA       | IVIg              | Minimal improvement  | 5  |
| Introna et al (Italy) <sup>12</sup>    | Yes (101)   | AMSAN     | 1 | NA       | IVIg              | Minimal improvement  | 4  |
| Rossetti et al (US) <sup>13</sup>      | Yes (181)   | NA        | 2 | NA       | IVIg              | Minimal improvement  | 1  |
| Nasuelli et al (Italy) <sup>14</sup>   | Yes (140)   | AIDP      | 1 | Negative | IVIg              | Definite improvement | 3  |
| Hughes et al (US) <sup>15</sup>        | Yes (107)   | AIDP      | 1 | NA       | IVIg              | Definite improvement | 1  |
| Prasad et al (US) <sup>16</sup>        | Yes (562)   | AIDP      | 1 | NA       | IVIg              | Definite improvement | 3  |
| Allen et al (UK) <sup>17</sup>         | Yes (162.6) | AIDP      | 1 | Negative | Oral prednisolone | Definite improvement | 1  |
|                                        | Yes (247.1) | Equivocal | 2 | Negative | IVIg              | Definite improvement | 1  |
| Ogbebor et al (US) <sup>18</sup>       | Yes (162)   | NA        | 2 | NA       | IVIg              | Definite improvement | 3  |
| Bonifacio et al (UK) <sup>19</sup>     | Yes (281)   | AIDP      | 1 | Negative | IVIg              | Minimal improvement  | 1  |
|                                        | Yes (199)   | AIDP      | 1 | Negative | IVIg              | Definite improvement | 2  |

|                                          |            |           |   |          |                      |                      |    |
|------------------------------------------|------------|-----------|---|----------|----------------------|----------------------|----|
|                                          | Yes (514)  | AIDP      | 1 | NA       | NA                   | Definite improvement | 2  |
|                                          | Yes (96)   | AIDP      | 1 | Negative | NA                   | Definite improvement | 2  |
|                                          | Yes (122)  | AIDP      | 1 | Negative | NA                   | Definite improvement | 1  |
| Bax et al (Italy) <sup>20</sup>          | Yes (397)  | AMSAN     | 1 | NA       | IVIg                 | Definite improvement | 1  |
|                                          | Yes (2272) | AIDP      | 1 | Negative | IVIg                 | Definite improvement | 1  |
| Matarneh et al (Qatar) <sup>21</sup>     | Yes (50)   | AIDP      | 1 | NA       | IVIg                 | Definite improvement | 0  |
| Trimboli et al (Italy) <sup>22</sup>     | NA         | AIDP      | 2 | NA       | IVIg                 | Definite improvement | 2  |
| Rao et al (US) <sup>23</sup>             | Yes (167)  | AIDP      | 1 | NA       | IVIg                 | Definite improvement | 1  |
| James et al (India) <sup>24</sup>        | Yes (149)  | AMSAN     | 1 | NA       | IVIg                 | Minimal improvement  | 3  |
|                                          | Yes (84)   | AIDP      | 1 | NA       | IVIg                 | Definite improvement | 3  |
|                                          | NA         | AIDP      | 1 | NA       | IVIg                 | Definite improvement | 2  |
| Kripalani et al (India) <sup>25</sup>    | Yes (91)   | AIDP      | 1 | NA       | IVIg                 | No improvement       | 4  |
| Patel et al (UK) <sup>26</sup>           | Yes (177)  | Equivocal | 2 | NA       | IVIg                 | Minimal improvement  | NA |
| Morehouse et al (US) <sup>27</sup>       | Yes (58)   | AMSAN     | 1 | NA       | IVIg                 | Minimal improvement  | 5  |
| Kanabar et al (UK) <sup>28</sup>         | Yes (164)  | AIDP      | 1 | NA       | IVIg                 | Definite improvement | 1  |
|                                          | Yes (160)  | AIDP      | 1 | NA       | IVIg                 | Recovered            | 0  |
| Dalwadi et al (US) <sup>29</sup>         | Yes (128)  | AMAN      | 1 | Negative | Plasmapheresis       | Definite improvement | 4  |
| Aomar-Millán et al (Spain) <sup>30</sup> | Yes (39)   | AMSAN     | 2 | Negative | IVIg, Plasmapheresis | Definite improvement | NA |
| Jain et al (US) <sup>31</sup>            | Yes (302)  | NA        | 2 | Positive | IVIg, Plasmapheresis | Recovered            | 0  |
| Márquez et al (US) <sup>32</sup>         | Yes (140)  | AIDP      | 1 | Negative | IVIg                 | Definite improvement | NA |

|                                          |             |           |   |    |      |                         |   |
|------------------------------------------|-------------|-----------|---|----|------|-------------------------|---|
| Da Silva et al<br>(Brazil) <sup>33</sup> | Yes (110)   | NA        | 2 | NA | IVIg | Minimal<br>improvement  | 3 |
| Shao et al<br>(Taiwan) <sup>34</sup>     | Yes (159.8) | Equivocal | 1 | NA | IVIg | Definite<br>improvement | 1 |

---

Abbreviations: GBS = Guillain-Barré syndrome; CSF = cerebrospinal fluid; AIDP = acute inflammatory demyelinating polyneuropathy; AMAN = acute motor axonal neuropathy; AMSAN = acute motor-sensory axonal neuropathy; IVIg = intravenous immune globulin; ICU = intensive care unit.

## References

1. Alter, M. The epidemiology of Guillain-Barré syndrome. *Ann Neurol.* **1990**, *27*, S7-S12.
2. van den Berg, B.; Walgaard, C.; Drenthen, J.; Fokke, C.; Jacobs, B.C.; van Doorn, P.A. Guillain-Barré syndrome: pathogenesis, diagnosis, treatment and prognosis. *Nat Rev Neurol.* **2014**, *10*, 469-482.
3. Asbury, A. K.; Cornblath, D. R. Assessment of current diagnostic criteria for Guillain-Barré syndrome. *Ann Neurol.* **1990**, *27*.
4. Shao, S.C.; Wang, C.H.; Chang, K.C.; Hung, M.J.; Chen, H.Y.; Liao, S.C. Guillain-Barré Syndrome Associated with COVID-19 Vaccination. *Emerging Infectious Diseases* **2021**, *27*, 3175-3178.
5. Hanson, K. E.; Goddard, K.; Lewis, N.; Fireman, B.; Myers, T. R.; Bakshi, N.; Weintraub, E.; Donahue, J. G.; Nelson, J. C.; Xu, S.; Glanz, J. M.; Williams, J. T.; Alpern, J. D.; Klein, N. P. Incidence of Guillain-Barré Syndrome After COVID-19 Vaccination in the Vaccine Safety Datalink. *JAMA Netw Open* **2022**, *5*, e228879.
6. Lupica, A.; Di Stefano, V.; Iacono, S.; Pignolo, A.; Quartana, M.; Gagliardo, A.; Fierro, B.; Brighina, F. Impact of COVID-19 in AChR Myasthenia Gravis and the Safety of Vaccines: Data from an Italian Cohort. *Neurol. Int.* **2022**, *14*, 406-416.
7. Khan, F.; Pallant, J.; Ng, L.; Bhasker, A. Factors associated with long-term functional outcomes and psychological sequelae in Guillain-Barre syndrome. *J. Neurol.* **2010**, *257*, 2024-2031.
8. Moher, D.; Liberati, A.; Tetzlaff, J.; Altman, D. Preferred Reporting Items for Systematic Reviews and Meta-Analyses: The PRISMA Statement. *PLoS Med.* **2009**, *6*, e1000097.
9. Wakerley, B.; Uncini, A.; Yuki, N. Guillain-Barré and Miller Fisher syndromes—new diagnostic classification. *Nat. Rev. Neurol.* **2014**, *10*, 537-544.
10. Fokke, C.; van den Berg, B.; Drenthen, J.; Walgaard, C.; van Doorn, P.; Jacobs, B. Diagnosis of Guillain-Barre syndrome and validation of Brighton criteria. *Brain* **2013**, *137*, 33-43.
11. Oo, W.; Giri, P.; de Souza, A. AstraZeneca COVID-19 vaccine and Guillain-Barré Syndrome in Tasmania: A causal link?. *J. Neuroimmunol.* **2021**, *360*, 577719.
12. García-Grimshaw, M.; Michel-Chávez, A.; Vera-Zertuche, J.; Galnares-Olalde, J.; Hernández-Vanegas, L.; Figueroa-Cucurachi, M.; Paredes-Ceballos, O.; Reyes-Terán, G.; Carbajal-Sandoval, G.; Ceballos-Liceaga, S.; Arauz, A.; Valdés-Ferrer, S. Guillain-Barré syndrome is infrequent among recipients of the BNT162b2 mRNA COVID-19 vaccine. *Clin. Immunol.* **2021**, *230*, 108818.
13. Hasan, T.; Khan, M.; Khan, F.; Hamza, G. Case of Guillain-Barré syndrome following COVID-19 vaccine. *BMJ Case Rep.* **2021**, *14*, e243629.
14. McKean, N.; Chircop, C. Guillain-Barré syndrome after COVID-19 vaccination. *BMJ Case Rep.* **2021**, *14*, e244125.
15. Razok, A.; Shams, A.; Almeer, A.; Zahid, M. Post-COVID-19 vaccine Guillain-Barré syndrome; first reported case from Qatar. *Ann. Med. Surg.* **2021**, *67*, 102540.
16. Min, Y.; Ju, W.; Ha, Y.; Ban, J.; Lee, S.; Sung, J.; Shin, J. Sensory Guillain-Barre syndrome following the ChAdOx1 nCov-19 vaccine: Report of two cases and review of literature. *J. Neuroimmunol.* **2021**, *359*, 577691.
17. Scendon, R.; Petrelli, C.; Scaloni, G.; Logullo, F. Electromyoneurography and laboratory findings in a case of Guillain-Barré syndrome after second dose of Pfizer COVID-19 vaccine. *Hum. Vaccin. Immunother.* **2021**, *17*, 4093-4096.

18. Suri, V.; Pandey, S.; Singh, J.; Jena, A. Acute-onset chronic inflammatory demyelinating polyneuropathy after COVID-19 infection and subsequent ChAdOx1 nCoV-19 vaccination. *BMJ Case Rep.* **2021**, *14*, e245816.
19. Waheed, S.; Bayas, A.; Hindi, F.; Rizvi, Z.; Espinosa, P. Neurological Complications of COVID-19: Guillain-Barre Syndrome Following Pfizer COVID-19 Vaccine. *Cureus* **2021**, *13*.
20. Tutar, N.; Eyigürebüz, T.; Yildirim, Z.; Kale, N. A variant of Guillain-Barre syndrome after SARS-CoV-2 vaccination: AMSAN. *Idegyógy. Sz.* **2021**, *74*, 286-288.
21. Maramattom, B.; Krishnan, P.; Paul, R.; Vishnu, S.C. Guillain-Barré Syndrome following ChAdOx1-S / nCoV -19 Vaccine. *Ann. Neurol.* **2021**, *90*, 312-314.
22. Introna, A.; Caputo, F.; Santoro, C.; Guerra, T.; Ucci, M.; Mezzapesa, D.; Trojano, M. Guillain-Barré syndrome after AstraZeneca COVID-19-vaccination: A causal or casual association?. *Clin. Neurol. Neurosurg.* **2021**, *208*, 106887.
23. Rossetti, A.; Gheihman, G.; O'Hare, M.; Kosowsky, J. Guillain-Barré Syndrome Presenting as Facial Diplegia after COVID-19 Vaccination: A Case Report. *J. Emerg. Med* **2021**, *61*, e141-e145.
24. Nasuelli, N.; De Marchi, F.; Cecchin, M.; De Paoli, I.; Onorato, S.; Pettinaroli, R.; Savoini, G.; Godi, L. A case of acute demyelinating polyradiculoneuropathy with bilateral facial palsy after ChAdOx1 nCoV-19 vaccine. *Neurol. Sci.* **2021**, *42*, 4747-4749.
25. Hughes, D.; Brunn, J.; Jacobs, J.; Todd, P.; Askari, F.; Fontana, R. Guillain-Barré Syndrome After COVID-19 mRNA Vaccination in a Liver Transplantation Recipient With Favorable Treatment Response. *Liver Transplant.* **2021**, *28*, 134-137.
26. Prasad, A.; Hurlburt, G.; Podury, S.; Tandon, M.; Kingree, S.; Sriwastava, S. A Novel Case of Bifacial Diplegia Variant of Guillain-Barré Syndrome Following Janssen COVID-19 Vaccination. *Neurol. Int.* **2021**, *13*, 404-409.
27. Allen, C.; Ramsamy, S.; Tarr, A.; Tighe, P.; Irving, P.; Tanasescu, R.; Evans, J. Guillain-Barré Syndrome Variant Occurring after SARS-CoV-2 Vaccination. *Ann. Neurol.* **2021**, *90*, 315-318.
28. Ogbebor, O.; Seth, H.; Min, Z.; Bhanot, N. Guillain-Barré syndrome following the first dose of SARS-CoV-2 vaccine: A temporal occurrence, not a causal association. *Idcases.* **2021**, *24*, e01143.
29. Bonifacio, GB.; Patel, D.; Cook, S.; et al. Bilateral facial weakness with paraesthesia variant of Guillain-Barré syndrome following Vaxzevria COVID-19 vaccine. *J. Neurol. Neurosurg.* **2021**, *93*, 341-342.
30. Bax, F.; Gigli, GL.; Belgrado, E.; Brunelli, L.; Valente, M. Guillain-Barré syndrome following Covid-19 immunization: a report of two cases. *Acta Neurol. Belg.* **2021**, *1-3*.
31. Matarneh, A.; Al-battah, A.; Farooqui, K.; Ghamoodi, M.; Alhatou, M. COVID-19 vaccine causing Guillain-Barre syndrome, a rare potential side effect. *Clin. Case Rep.* **2021**, *9*, e04756.
32. Trimboli, M.; Zoleo, P.; Arabia, G.; Gambardella, A. Guillain-Barré syndrome following BNT162b2 COVID-19 vaccine. *Neurol. Sci.* **2021**, *42*, 4401-4402.
33. Rao, S.; Khurana, S.; Murthy, G.; Dawson, E.; Jazebi, N.; Haas, C. A case of Guillain-Barre syndrome following Pfizer COVID-19 vaccine. *J. Community Hosp. Intern. Med. Perspect.* **2021**, *11*, 597-600.
34. James, J.; Jose, J.; Gafoor, V.; Smita, B.; Balaram, N. Guillain-Barré syndrome following ChAdOx1 nCoV-19 COVID-19 vaccination: A case series. *Neurol. Clin. Neurosci.* **2021**, *9*, 402-405.

35. Kripalani, Y.; Lakkappan, V.; Parulekar, L.; Shaikh, A.; Singh, R.; Vyas, P. A Rare Case of Guillain-Barré Syndrome following COVID-19 Vaccination. *Eur. J. Case Rep. Intern. Med.* **2021**, *8*.
36. Patel, S.; Khurram, R.; Lakhani, A.; Quirk, B. Guillain-Barre syndrome following the first dose of the chimpanzee adenovirus-vectored COVID-19 vaccine, ChAdOx1. *BMJ Case Rep.* **2021**, *14*, e242956.
37. Morehouse, Z.; Paulus, A.; Jasti, S.; Bing, X. A Rare Variant of Guillain-Barre Syndrome Following Ad26.COV2.S Vaccination. *Cureus.* **2021**, *13*, e18153.
38. Kanabar, G.; Wilkinson, P. Guillain-Barré syndrome presenting with facial diplegia following COVID-19 vaccination in two patients. *BMJ Case Rep.* **2021**, *14*, e244527.
39. Dalwadi, V.; Hancock, D.; Ballout, A.; Geraci, A. Axonal-Variant Guillian-Barre Syndrome Temporally Associated With mRNA-Based Moderna SARS-CoV-2 Vaccine. *Cureus.* **2021**, *13*, e18291.
40. Aomar-Millán, I.; Martínez de Victoria-Carazo, J.; Peregrina-Rivas, J.; Villegas-Rodríguez, I. COVID-19, Guillain-Barré syndrome, and the vaccine. A dangerous combination. *Rev Clin Esp.* **2021**, *221*, 555-557.
41. Jain, E.; Pandav, K.; Regmi, P.; Michel, G.; Altshuler, I. Facial Diplegia: A Rare, Atypical Variant of Guillain-Barré Syndrome and Ad26.COV2.S Vaccine. *Cureus.* **2021**, *13*, e16612.
42. Márquez Loza, A.; Holroyd, K.; Johnson, S.; Pilgrim, D.; Amato, A. Guillain-Barré Syndrome in the Placebo and Active Arms of a COVID-19 Vaccine Clinical Trial. *Neurol.* **2021**, *96*, 1052-1054.
43. Silva, G.; Silva, C.; Oliveira, R.; et al. Guillain-Barré syndrome after coronavirus disease 2019 vaccine: A temporal association. *Clin. Exp. Neuroimmunol.* **2021**.
44. Shao, S.; Wang, C.; Chang, K.; Hung, M.; Chen, H.; Liao, S. Guillain-Barré Syndrome Associated with COVID-19 Vaccination. *Emerging Infect. Dis.* **2021**, *27*, 3175-3178.
45. Lunn, MP.; Cornblath, DR.; Jacobs, BC.; et al. COVID-19 vaccine and Guillain-Barré syndrome: let's not leap to associations. *Brain.* **2021**, *144*, 357-360.
46. Woo, E.; Mba-Jonas, A.; Dimova, R.; Alimchandani, M.; Zinderman, C.; Nair, N. Association of Receipt of the Ad26.COV2.S COVID-19 Vaccine With Presumptive Guillain-Barré Syndrome, February-July 2021. *JAMA.* **2021**, *326*, 1606.
47. Klugar, M.; Riad, A.; Mekhemar, M.; et al. Side effects of mRNA-based and viral vector-based COVID-19 vaccines among German healthcare workers. *Biology.* **2021**, *10*, 752.
48. Klein, S.; Jedlicka, A.; Pekosz, A. The Xs and Y of immune responses to viral vaccines. *Lancet Infect. Dis.* **2010**, *10*, 338-349.
49. Iftikhar, H.; Noor, S. U.; Masood, M.; et al. Bell's Palsy After 24 Hours of mRNA-1273 SARS-CoV-2 Vaccine. *Cureus.* **2021**, *13*, e15935.
50. Wan, EYF.; Chui, CSL.; Lai, FTT.; et al. Bell's palsy following vaccination with mRNA (BNT162b2) and inactivated (CoronaVac) SARS-CoV-2 vaccines: a case series and nested case-control study. *Lancet Infect. Dis.* **2022**, *22*, 64-72.
51. Goodman, JL.; Grabenstein, JD.; Braun, MM. Answering key questions about COVID-19 vaccines. *JAMA.* **2020**, *324*, 2027-2028.
